# Supplementary material for: Short-chain fatty acids accompanying changes in the gut microbiome contribute to the development of hypertension in patients with preeclampsia
Source: Oxford University Press journal article supplement (doi:10.1042/cs20191253), 2020-01-01
Supplement: cs-2019-1253_supp.pdf [file cs-2019-1253_supp.pdf]

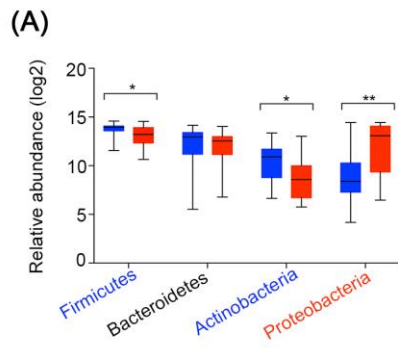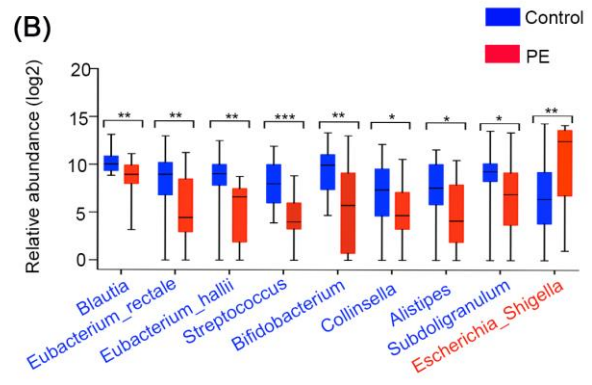

**Supplementary Figure S1. (A, B)** The gut microbiota between the HPC group (n = 36) and PE patients without comorbidities of chronic hypertension or gestational diabetes (n = 14) differed significantly at the phylum and genus levels. \* $p < 0.05$ , \*\* $p < 0.01$ , \*\*\* $p < 0.001$ .

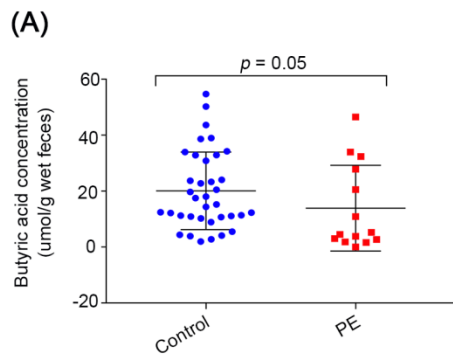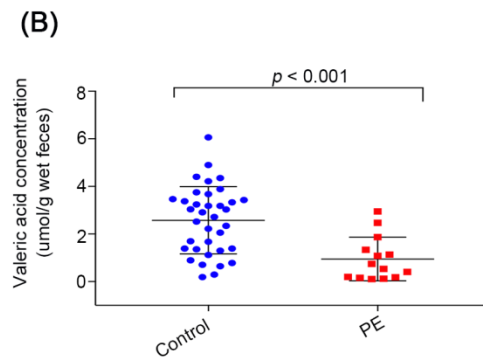

**Supplementary Figure S2. (A, B)** When compared between the HPC group (n = 36) and PE patients without comorbidities of chronic hypertension or gestational diabetes (n = 14), the faecal butyric acid levels did not markedly differ, whereas the valeric acid level decreased significantly in patients with PE.
